# Supplementary material for: Conservation gaps and priorities of range-restricted birds in the Northern Andes
Source: PeerJ. 2024 Feb 26;12:e16893. doi: 10.7717/peerj.16893 (PMC10903353; doi:10.7717/peerj.16893)
Supplement: Supplemental Information 1 — This dataset follows Clements’s (2020) taxonomical order and provides scientific names used by both Birdlife and eBird. [file peerj-12-16893-s001.xlsx]

## Sheet: Sheet1
ORDER	FAMILY	Scientific Name (BirdLife)	Common Name	Lower Elevation	Upper Elevation	IUCN Category	IUCN Population Trend	Range (km²)	AOH (km²)	AOH/Range *	AOH Protected (km²)	AOH Protected (%)	<10,000 km² AOH & <33% protection **	Country	Scientific Name (eBird)	eBird Code
STRUTHIONIFORMES	TINAMIDAE	Crypturellus kerriae	Choco Tinamou	0	1500	VU	Decreasing	6147.2	8052	1.30987	2986	37.084	No	Colombia Panama	Crypturellus kerriae	chotin1
STRUTHIONIFORMES	TINAMIDAE	Tinamus osgoodi	Black Tinamou	486	2419	VU	Decreasing	28701.8	56981	1.98528	29753	52.2157	No	Colombia Ecuador Peru	Tinamus osgoodi	blatin1
GALLIFORMES	CRACIDAE	Crax alberti	Blue-billed Curassow	0	1323	CR	Decreasing	4775.15	4765	0.997874	851	17.8594	Yes	Colombiae	Crax alberti	bubcur1
GALLIFORMES	CRACIDAE	Penelope perspicax	Cauca Guan	900	2640	VU	Decreasing	6162.31	3862	0.626713	693	17.9441	Yes	Colombiae	Penelope perspicax	caugua1
GALLIFORMES	CRACIDAE	Penelope albipennis	White-winged Guan	148	1656	EN	Stable	3108.83	898	0.288854	189	21.0468	Yes	Perue	Penelope albipennis	whwgua1
GALLIFORMES	CRACIDAE	Penelope barbata	Bearded Guan	929	3372	NT	Decreasing	16461.3	12262	0.744901	3529	28.78	No	Ecuador Peru	Penelope barbata	beagua1
GALLIFORMES	CRACIDAE	Pauxi pauxi	Helmeted Curassow	500	2275	EN	Decreasing	40122.8	25394	0.632907	18221	71.7532	No	Colombia Venezuela	Pauxi pauxi	helcur1
GALLIFORMES	ODONTOPHORIDAE	Odontophorus melanonotus	Dark-backed Wood-quail	774	2690	VU	Decreasing	5430.53	6753	1.24353	2395	35.4657	No	Colombia Ecuador	Odontophorus melanonotus	dbwqua1
GALLIFORMES	ODONTOPHORIDAE	Odontophorus strophium	Gorgeted Wood-quail	466	2913	VU	Decreasing	3431.34	5507	1.60491	2521	45.7781	No	Colombiae	Odontophorus strophium	gowqua1
GALLIFORMES	ODONTOPHORIDAE	Odontophorus atrifrons	Black-fronted Wood-quail	611	3540	VU	Decreasing	2154.63	8734	4.05359	4278	48.981	No	Colombia Venezuela	Odontophorus atrifrons	bfwqua1
GALLIFORMES	ODONTOPHORIDAE	Odontophorus columbianus	Venezuelan Wood-quail	49	2400	NT	Decreasing	9356.6	4884	0.521985	4470	91.5233	No	Venezuelae	Odontophorus columbianus	venwoq1
GALLIFORMES	ODONTOPHORIDAE	Odontophorus dialeucos	Tacarcuna Wood-quail	815	1655	LC	Stable	233.705	280	1.19809	278	99.2857	No	Colombia Panama	Odontophorus dialeucos	tawqua1
COLUMBIFORMES	COLUMBIDAE	Patagioenas oenops	Peruvian Pigeon	467	2400	NT	Decreasing	12881.1	11506	0.893247	409	3.55467	No	Ecuador Peru	Patagioenas oenops	perpig2
COLUMBIFORMES	COLUMBIDAE	Leptotila conoveri	Tolima Dove	963	2613	NT	Decreasing	7847.08	13083	1.66724	1435	10.9684	No	Colombiae	Leptotila conoveri	toldov1
COLUMBIFORMES	COLUMBIDAE	Leptotila ochraceiventris	Ochre-bellied Dove	9	1999	VU	Decreasing	21934.1	21493	0.979889	5376	25.0128	No	Ecuador Peru	Leptotila ochraceiventris	ocbdov1
COLUMBIFORMES	COLUMBIDAE	Zentrygon goldmani	Russet-crowned Quail-dove	44	1600	NT	Stable	6013.08	14681	2.44151	8693	59.2126	No	Panamae	Zentrygon goldmani	rcqdov1
COLUMBIFORMES	COLUMBIDAE	Zentrygon lawrencii	Purplish-backed Quail-dove	286	1674	LC	Decreasing	7969.99	14194	1.78093	8544	60.1944	No	CostaRica Panama	Zentrygon lawrencii	pbqdov1
CUCULIFORMES	CUCULIDAE	Neomorphus radiolosus	Banded Ground-cuckoo	30	1731	EN	Decreasing	18046.7	23480	1.30107	4852	20.6644	No	Colombia Ecuador	Neomorphus radiolosus	bagcuc1
CAPRIMULGIFORMES	APODIDAE	Tachornis furcata	Pygmy Swift	0	2985	LC	Decreasing	32700.9	15538	0.475155	11934	76.8053	No	Colombia Venezuela	Tachornis furcata	pygswi1
CAPRIMULGIFORMES	TROCHILIDAE	Loddigesia mirabilis	Marvelous Spatuletail	1765	2918	EN	Decreasing	1772.9	1336	0.753567	188	14.0719	Yes	Perue	Loddigesia mirabilis	marspa1
CAPRIMULGIFORMES	TROCHILIDAE	Anthocephala berlepschi	Tolima Blossomcrown	1200	2963	VU	Decreasing	8294.48	10540	1.27072	1504	14.2694	No	Colombiae	Anthocephala berlepschi	tolblo1
CAPRIMULGIFORMES	TROCHILIDAE	Urosticte benjamini	Purple-bibbed Whitetip	700	2275	LC	Decreasing	17379.1	12266	0.705791	1865	15.2046	No	Colombia Ecuador	Urosticte benjamini	pubwhi1
CAPRIMULGIFORMES	TROCHILIDAE	Eriocnemis sapphiropygia	Coppery-naped Puffleg	1143	4800	LC	Stable	44637.5	21202	0.474982	3261	15.3806	No	Perue	Eriocnemis luciani sapphiropygia/catharina	savpuf3
CAPRIMULGIFORMES	TROCHILIDAE	Heliodoxa gularis	Pink-throated Brilliant	250	1231	LC	Decreasing	19679.5	20574	1.04545	3316	16.1174	No	Colombia Ecuador	Heliodoxa gularis	pitbri1
CAPRIMULGIFORMES	TROCHILIDAE	Phaethornis porcullae	Porculla Hermit	368	2100	LC	Unknown	22056.5	9517	0.431482	1609	16.9066	Yes	Ecuador Peru	Phaethornis griseogularis porcullae	gycher3
CAPRIMULGIFORMES	TROCHILIDAE	Coeligena bonapartei	Golden-bellied Starfrontlet	1400	3494	LC	Decreasing	16101.5	14098	0.875572	2384	16.9102	No	Colombiae	Coeligena bonapartei	gobsta1
CAPRIMULGIFORMES	TROCHILIDAE	Aglaiocercus coelestis	Violet-tailed Sylph	684	2521	LC	Stable	28059.9	47530	1.69388	8581	18.0539	No	Colombia Ecuador	Aglaiocercus coelestis	vitsyl1
CAPRIMULGIFORMES	TROCHILIDAE	Heliodoxa imperatrix	Empress Brilliant	400	2521	LC	Unknown	22063.3	25460	1.15395	4609	18.1029	No	Colombia Ecuador	Heliodoxa imperatrix	empbri1
CAPRIMULGIFORMES	TROCHILIDAE	Boissonneaua jardini	Velvet-purple Coronet	350	2521	LC	Decreasing	30985.5	29156	0.940956	5288	18.1369	No	Colombia Ecuador	Boissonneaua jardini	vepcor1
CAPRIMULGIFORMES	TROCHILIDAE	Thaumasius baeri	Tumbes Hummingbird	0	1994	LC	Stable	29962.8	13141	0.438577	2543	19.3516	No	Ecuador Peru	Thaumasius baeri	tumhum1
CAPRIMULGIFORMES	TROCHILIDAE	Urochroa bougueri	Rufous-gaped Hillstar	742	2800	LC	Unknown	40201.5	33132	0.824147	6785	20.4787	No	Colombia Ecuador	Urochroa bougueri	whthil2
CAPRIMULGIFORMES	TROCHILIDAE	Saucerottia castaneiventris	Chestnut-bellied Hummingbird	340	2729	NT	Decreasing	4916.59	6825	1.38816	1455	21.3187	Yes	Colombiae	Saucerottia castaneiventris	chbhum1
CAPRIMULGIFORMES	TROCHILIDAE	Haplophaedia lugens	Hoary Puffleg	770	2500	NT	Decreasing	4915.22	5256	1.06933	1126	21.4231	Yes	Colombia Ecuador	Haplophaedia lugens	hoapuf1
CAPRIMULGIFORMES	TROCHILIDAE	Coeligena prunellei	Black Inca	1098	3110	VU	Decreasing	9336.58	12766	1.36731	2954	23.1396	No	Colombiae	Coeligena prunellei	blainc1
CAPRIMULGIFORMES	TROCHILIDAE	Coeligena wilsoni	Brown Inca	684	2313	LC	Decreasing	34158.9	21334	0.624552	5121	24.0039	No	Colombia Ecuador	Coeligena wilsoni	broinc2
CAPRIMULGIFORMES	TROCHILIDAE	Chalcostigma heteropogon	Bronze-tailed Thornbill	1827	3900	LC	Decreasing	29040.9	19865	0.684036	4838	24.3544	No	Colombia Venezuela	Chalcostigma heteropogon	brttho1
CAPRIMULGIFORMES	TROCHILIDAE	Heliangelus viola	Purple-throated Sunangel	1290	3773	LC	Stable	35976.8	33123	0.920676	8270	24.9675	No	Ecuador Peru	Heliangelus viola	putsun1
CAPRIMULGIFORMES	TROCHILIDAE	Eriocnemis isabellae	Gorgeted Puffleg	1934	4322	CR	Decreasing	44.2101	8	0.180954	2	25	Yes	Colombiae	Eriocnemis isabellae	gorpuf1
CAPRIMULGIFORMES	TROCHILIDAE	Metallura theresiae	Coppery Metaltail	1714	3820	LC	Decreasing	34923.5	23113	0.661818	6125	26.5002	No	Perue	Metallura theresiae	copmet1
CAPRIMULGIFORMES	TROCHILIDAE	Coeligena helianthea	Blue-throated Starfrontlet	1834	3428	LC	Unknown	42112.9	17433	0.413959	4926	28.2568	No	Colombia Venezuela	Coeligena helianthea	bltsta1
CAPRIMULGIFORMES	TROCHILIDAE	Campylopterus villaviscensio	Napo Sabrewing	548	1762	NT	Decreasing	36504.6	25857	0.708321	7891	30.5178	No	Colombia Ecuador Peru	Campylopterus villaviscensio	napsab1
CAPRIMULGIFORMES	TROCHILIDAE	Saucerottia viridigaster	Green-bellied Hummingbird	259	2285	LC	Decreasing	42935.8	34752	0.809395	10732	30.8817	No	Colombia Venezuela	Saucerottia viridigaster	grbhum1
CAPRIMULGIFORMES	TROCHILIDAE	Eriocnemis mosquera	Golden-breasted Puffleg	1200	4195	LC	Stable	34835.8	29633	0.850648	9268	31.2759	No	Colombia Ecuador	Eriocnemis mosquera	gobpuf1
CAPRIMULGIFORMES	TROCHILIDAE	Heliangelus regalis	Royal Sunangel	550	2343	NT	Decreasing	5218.9	4648	0.890608	1510	32.4871	Yes	Ecuador Peru	Heliangelus regalis	roysun1
CAPRIMULGIFORMES	TROCHILIDAE	Eriocnemis derbyi	Black-thighed Puffleg	1934	4322	NT	Decreasing	24534.7	14729	0.600334	4883	33.1523	No	Colombia Ecuador	Eriocnemis derbyi	bltpuf1
CAPRIMULGIFORMES	TROCHILIDAE	Urosticte ruficrissa	Rufous-vented Whitetip	939	2400	LC	Decreasing	31247.6	41393	1.32468	14400	34.7885	No	Colombia Ecuador Peru	Urosticte ruficrissa	ruvwhi1
CAPRIMULGIFORMES	TROCHILIDAE	Eriocnemis cupreoventris	Coppery-bellied Puffleg	1950	3641	NT	Decreasing	49722.5	25364	0.510112	8939	35.2429	No	Colombia Venezuela	Eriocnemis cupreoventris	cobpuf1
CAPRIMULGIFORMES	TROCHILIDAE	Heliangelus clarisse	Longuemare's Sunangel	1593	3600	LC	Stable	49302.6	27513	0.558043	9881	35.9139	No	Colombia Venezuela	Heliangelus clarisse	amtsun2
CAPRIMULGIFORMES	TROCHILIDAE	Campylopterus phainopeplus	Santa Marta Sabrewing	39	4800	CR	Decreasing	2619.83	3487	1.331	1269	36.3923	No	Colombiae	Campylopterus phainopeplus	samsab1
CAPRIMULGIFORMES	TROCHILIDAE	Eriocnemis mirabilis	Colorful Puffleg	951	2600	EN	Decreasing	33.9515	38	1.11924	14	36.8421	No	Colombiae	Eriocnemis mirabilis	colpuf2
CAPRIMULGIFORMES	TROCHILIDAE	Chaetocercus berlepschi	Esmeraldas Woodstar	6	1430	VU	Decreasing	5021.77	2674	0.532481	1025	38.3321	No	Ecuadore	Chaetocercus berlepschi	esmwoo2
CAPRIMULGIFORMES	TROCHILIDAE	Eriocnemis luciani	Sapphire-vented Puffleg	2236	4800	LC	Stable	37957.6	11981	0.315642	4828	40.2971	No	Colombia Ecuador Venezuela	Eriocnemis luciani luciani	savpuf2
CAPRIMULGIFORMES	TROCHILIDAE	Coeligena orina	Glittering Starfrontlet	1526	3642	EN	Decreasing	1999.35	3056	1.52849	1313	42.9647	No	Colombiae	Coeligena orina	dussta1
CAPRIMULGIFORMES	TROCHILIDAE	Opisthoprora euryptera	Mountain Avocetbill	2069	4187	LC	Stable	26992.2	25014	0.926712	10777	43.0839	No	Colombia Ecuador Peru	Opisthoprora euryptera	mouavo1
CAPRIMULGIFORMES	TROCHILIDAE	Chaetocercus astreans	Santa Marta Woodstar	825	2596	LC	Stable	6505.06	2570	0.395077	1126	43.8132	No	Colombiae	Chaetocercus astreans	samwoo2
CAPRIMULGIFORMES	TROCHILIDAE	Heliangelus mavors	Orange-throated Sunangel	1226	3985	LC	Stable	38610.6	16572	0.429209	7572	45.6915	No	Colombia Venezuela	Heliangelus mavors	ortsun1
CAPRIMULGIFORMES	TROCHILIDAE	Heliangelus micraster	Little Sunangel	1759	3400	LC	Unknown	17855.6	5333	0.298673	2532	47.478	No	Ecuador Peru	Heliangelus micraster	litsun1
CAPRIMULGIFORMES	TROCHILIDAE	Chlorostilbon russatus	Coppery Emerald	83	2605	LC	Unknown	27766	11862	0.427213	5659	47.707	No	Colombia Venezuela	Chlorostilbon russatus	copeme1
CAPRIMULGIFORMES	TROCHILIDAE	Heliangelus strophianus	Gorgeted Sunangel	1200	2800	LC	Decreasing	9555.14	3876	0.405646	1863	48.065	No	Colombia Ecuador	Heliangelus strophianus	gorsun1
CAPRIMULGIFORMES	TROCHILIDAE	Metallura odomae	Neblina Metaltail	1928	3476	LC	Decreasing	8418.38	5474	0.650244	2738	50.0183	No	Ecuador Peru	Metallura odomae	nebmet1
CAPRIMULGIFORMES	TROCHILIDAE	Urochroa leucura	White-tailed Hillstar	1043	2800	LC	Unknown	32712.9	21625	0.661054	11496	53.1607	No	Colombia Ecuador Peru	Urochroa leucura	whthil3
CAPRIMULGIFORMES	TROCHILIDAE	Chaetocercus jourdanii	Rufous-shafted Woodstar	345	3000	LC	Stable	46449.7	47627	1.02535	27366	57.459	No	Colombia Venezuela	Chaetocercus jourdanii	ruswoo1
CAPRIMULGIFORMES	TROCHILIDAE	Coeligena phalerata	White-tailed Starfrontlet	1334	3700	NT	Decreasing	2979.74	1971	0.661466	1161	58.9041	No	Colombiae	Coeligena phalerata	whtsta1
CAPRIMULGIFORMES	TROCHILIDAE	Anthocephala floriceps	Santa Marta Blossomcrown	600	2364	VU	Decreasing	3065.92	1935	0.631131	1188	61.3953	No	Colombiae	Anthocephala floriceps	samblo1
CAPRIMULGIFORMES	TROCHILIDAE	Heliangelus spencei	Merida Sunangel	1607	4388	LC	Unknown	5774.86	1684	0.291609	1046	62.114	No	Venezuelae	Heliangelus spencei	amtsun4
CAPRIMULGIFORMES	TROCHILIDAE	Coeligena conradii	Green Inca	1127	3000	LC	Decreasing	23458.4	10650	0.453994	6809	63.9343	No	Colombia Venezuela	Coeligena conradii	colinc4
CAPRIMULGIFORMES	TROCHILIDAE	Ramphomicron dorsale	Black-backed Thornbill	831	4600	EN	Decreasing	2604.07	1649	0.633239	1069	64.8272	No	Colombiae	Ramphomicron dorsale	blbtho1
CAPRIMULGIFORMES	TROCHILIDAE	Coeligena consita	Perija Starfrontlet	1731	3094	EN	Decreasing	2360.69	1256	0.532049	868	69.1083	No	Colombia Venezuela	Coeligena consita	gobsta2
CAPRIMULGIFORMES	TROCHILIDAE	Metallura iracunda	Perija Metaltail	1038	3222	EN	Decreasing	1650.98	2094	1.26834	1457	69.5798	No	Colombia Venezuela	Metallura iracunda	permet1
CAPRIMULGIFORMES	TROCHILIDAE	Metallura baroni	Violet-throated Metaltail	2799	4036	EN	Decreasing	2725.46	631	0.23152	442	70.0475	No	Ecuadore	Metallura baroni	vitmet1
CAPRIMULGIFORMES	TROCHILIDAE	Eriocnemis nigrivestis	Black-breasted Puffleg	1700	3757	EN	Decreasing	51.6612	77	1.49048	54	70.1299	No	Ecuadore	Eriocnemis nigrivestis	blbpuf3
CAPRIMULGIFORMES	TROCHILIDAE	Sternoclyta cyanopectus	Violet-chested Hummingbird	49	2000	LC	Unknown	40401	18860	0.46682	13364	70.859	No	Colombia Venezuela	Sternoclyta cyanopectus	vichum2
CAPRIMULGIFORMES	TROCHILIDAE	Coeligena eos	Golden Starfrontlet	1400	3200	LC	Decreasing	14076.9	5449	0.387089	3903	71.6278	No	Venezuelae	Coeligena eos	gobsta4
CAPRIMULGIFORMES	TROCHILIDAE	Chlorostilbon alice	Green-tailed Emerald	11	2124	LC	Stable	21437.4	29989	1.39891	22475	74.9441	No	Venezuelae	Chlorostilbon alice	grteme1
CAPRIMULGIFORMES	TROCHILIDAE	Campylopterus ensipennis	White-tailed Sabrewing	5	1830	NT	Decreasing	2404.28	2690	1.11884	2080	77.3234	No	Venezuelae	Campylopterus ensipennis	whtsab1
CAPRIMULGIFORMES	TROCHILIDAE	Goldmania violiceps	Violet-capped Hummingbird	600	1415	NT	Decreasing	2852.72	1254	0.43958	1060	84.5295	No	Colombia Panama	Goldmania violiceps	vichum1
CAPRIMULGIFORMES	TROCHILIDAE	Goldmania bella	Pirre Hummingbird	398	1580	NT	Unknown	1893.24	1403	0.741058	1228	87.5267	No	Panamae	Goldmania bella	ruchum1
CAPRIMULGIFORMES	TROCHILIDAE	Hylonympha macrocerca	Scissor-tailed Hummingbird	401	1246	EN	Decreasing	227.613	109	0.478884	104	95.4128	No	Venezuelae	Hylonympha macrocerca	scthum1
CAPRIMULGIFORMES	TROCHILIDAE	Aglaiocercus berlepschi	Venezuelan Sylph	939	2193	EN	Decreasing	4153.74	931	0.224135	930	99.8926	No	Venezuelae	Aglaiocercus berlepschi	vensyl1
ACCIPITRIFORMES	ACCIPITRIDAE	Pseudastur occidentalis	Grey-backed Hawk	4	2900	EN	Decreasing	6586.8	36815	5.58921	9079	24.6611	No	Ecuador Peru	Pseudastur occidentalis	gybhaw2
STRIGIFORMES	STRIGIDAE	Megascops colombianus	Colombian Screech-owl	1080	2431	NT	Decreasing	13694.2	25898	1.89117	5279	20.3838	No	Colombia Ecuador	Megascops ingens colombianus	colsco1
STRIGIFORMES	STRIGIDAE	Glaucidium nubicola	Cloudforest Pygmy-owl	530	2764	VU	Decreasing	6915.65	17649	2.55204	4263	24.1543	No	Colombia Ecuador	Glaucidium nubicola	clopyo1
STRIGIFORMES	STRIGIDAE	Megascops petersoni	Cinnamon Screech-owl	964	2358	LC	Decreasing	18835.6	19786	1.05046	5287	26.7209	No	Colombia Ecuador Peru	Megascops petersoni	cinsco1
STRIGIFORMES	STRIGIDAE	Glaucidium parkeri	Subtropical Pygmy-owl	297	1975	LC	Stable	29012.1	140923	4.85739	45843	32.5305	No	Bolivia Colombia Ecuador Peru	Glaucidium parkeri	supowl1
STRIGIFORMES	STRIGIDAE	Xenoglaux loweryi	Long-whiskered Owlet	1661	2720	VU	Stable	1624.29	1256	0.77326	642	51.1146	No	Perue	Xenoglaux loweryi	lowowl1
STRIGIFORMES	STRIGIDAE	Megascops gilesi	Santa Marta Screech-owl	1270	2596	VU	Decreasing	4488.81	1382	0.307877	1015	73.4443	No	Colombiae	Megascops gilesi	samsco1
STRIGIFORMES	STRIGIDAE	Megascops clarkii	Bare-shanked Screech-owl	70	3330	LC	Stable	9927.98	3835	0.386282	3256	84.9022	No	Colombia CostaRica Panama	Megascops clarkii	bssowl
TROGONIFORMES	TROGONIDAE	Pharomachrus fulgidus	White-tipped Quetzal	900	2596	LC	Decreasing	16767.2	6239	0.372096	4254	68.184	No	Colombia Venezuela	Pharomachrus fulgidus	whtque1
GALBULIFORMES	BUCCONIDAE	Nystactes noanamae	Sooty-capped Puffbird	0	100	NT	Decreasing	16632.7	17496	1.0519	2004	11.454	No	Colombiae	Bucco noanamae	socpuf1
GALBULIFORMES	BUCCONIDAE	Hapaloptila castanea	White-faced Nunbird	750	2900	LC	Stable	31778.4	82900	2.60869	22115	26.6767	No	Colombia Ecuador Peru	Hapaloptila castanea	whfnun2
GALBULIFORMES	GALBULIDAE	Galbula pastazae	Coppery-chested Jacamar	837	2085	LC	Decreasing	31392.6	30419	0.968985	12387	40.7213	No	Colombia Ecuador Peru	Galbula pastazae	cocjac2
PICIFORMES	CAPITONIDAE	Capito quinticolor	Five-colored Barbet	0	743	NT	Decreasing	27642.7	30204	1.09266	2545	8.42604	No	Colombia Ecuador	Capito quinticolor	ficbar1
PICIFORMES	CAPITONIDAE	Capito hypoleucus	White-mantled Barbet	188	2215	VU	Decreasing	3663.83	21745	5.93505	3521	16.1922	No	Colombiae	Capito hypoleucus	whmbar1
PICIFORMES	SEMNORNITHIDAE	Semnornis ramphastinus	Toucan Barbet	770	2671	NT	Decreasing	44636.6	30345	0.679824	6390	21.0578	No	Colombia Ecuador	Semnornis ramphastinus	toubar1
PICIFORMES	RAMPHASTIDAE	Andigena laminirostris	Plate-billed Mountain-toucan	1200	3128	NT	Decreasing	8537.94	6371	0.746199	1847	28.9907	Yes	Colombia Ecuador	Andigena laminirostris	pbmtou1
PICIFORMES	RAMPHASTIDAE	Aulacorhynchus calorhynchus	Yellow-billed Toucanet	400	2440	LC	Decreasing	27004.4	12604	0.466738	8860	70.2951	No	Colombia Venezuela	Aulacorhynchus sulcatus calorhynchus	grbtou2
PICIFORMES	RAMPHASTIDAE	Aulacorhynchus sulcatus	Groove-billed Toucanet	26	2440	LC	Decreasing	30220.9	11887	0.393336	9498	79.9024	No	Venezuelae	Aulacorhynchus sulcatus sulcatus	grbtou3
PICIFORMES	PICIDAE	Picumnus granadensis	Greyish Piculet	543	2200	LC	Decreasing	27384.6	29354	1.07192	4004	13.6404	No	Colombiae	Picumnus granadensis	grapic1
PICIFORMES	PICIDAE	Melanerpes pulcher	Beautiful Woodpecker	95	1741	LC	Stable	48455.2	41627	0.859082	5766	13.8516	No	Colombiae	Melanerpes pulcher	beawoo2
PICIFORMES	PICIDAE	Picumnus sclateri	Ecuadorian Piculet	0	2079	LC	Stable	44945.2	32307	0.718808	7791	24.1155	No	Ecuador Peru	Picumnus sclateri	ecupic1
PICIFORMES	PICIDAE	Picumnus steindachneri	Speckle-chested Piculet	445	2878	EN	Decreasing	7117.94	5559	0.780984	1407	25.3103	Yes	Perue	Picumnus steindachneri	spcpic1
PICIFORMES	PICIDAE	Piculus callopterus	Stripe-cheeked Woodpecker	67	1415	LC	Decreasing	5548.2	6418	1.15677	3903	60.8133	No	Colombia Panama Panama	Piculus callopterus	stcwoo1
PSITTACIFORMES	PSITTACIDAE	Forpus xanthops	Yellow-faced Parrotlet	600	3395	VU	Stable	2369.79	817	0.344756	55	6.73195	Yes	Perue	Forpus xanthops	yefpar2
PSITTACIFORMES	PSITTACIDAE	Forpus spengeli	Turquoise-winged Parrotlet	0	1200	LC	Decreasing	25871.9	13294	0.51384	1173	8.82353	No	Colombiae	Forpus spengeli	buwpar1
PSITTACIFORMES	PSITTACIDAE	Pyrrhura pacifica	Choco Parakeet	0	1898	LC	Stable	30514.6	25564	0.837762	3410	13.3391	No	Colombia Ecuador	Pyrrhura melanura pacifica	matpar4
PSITTACIFORMES	PSITTACIDAE	Pyrrhura peruviana	Wavy-breasted Parakeet	100	1650	LC	Decreasing	39672.9	89367	2.25259	16801	18.8	No	Ecuador Peru	Pyrrhura roseifrons peruviana/dilutissima	rofpar5
PSITTACIFORMES	PSITTACIDAE	Ognorhynchus icterotis	Yellow-eared Parrot	1200	3400	VU	Increasing	4135.56	8729	2.11072	1883	21.5718	Yes	Colombiae	Ognorhynchus icterotis	yeepar1
PSITTACIFORMES	PSITTACIDAE	Brotogeris pyrrhoptera	Grey-cheeked Parakeet	1	1550	VU	Decreasing	25806.4	31772	1.23117	6943	21.8526	No	Ecuador Peru	Brotogeris pyrrhoptera	gycpar1
PSITTACIFORMES	PSITTACIDAE	Pyrrhura calliptera	Brown-breasted Parakeet	1167	3641	VU	Decreasing	2459.95	10709	4.35333	2538	23.6997	No	Colombia Venezuela	Pyrrhura calliptera	brbpar2
PSITTACIFORMES	PSITTACIDAE	Touit stictopterus	Spot-winged Parrotlet	455	2343	NT	Decreasing	42364	104923	2.4767	26458	25.2166	No	Colombia Ecuador Peru	Touit stictopterus	spwpar2
PSITTACIFORMES	PSITTACIDAE	Pyrrhura chapmani	Upper Magdalena Parakeet	856	2800	VU	Decreasing	14776.7	1782	0.120595	468	26.2626	Yes	Colombiae	Pyrrhura melanura chapmani	matpar5
PSITTACIFORMES	PSITTACIDAE	Pyrrhura albipectus	White-necked Parakeet	874	2522	VU	Decreasing	7670.99	9246	1.20532	2762	29.8724	Yes	Ecuador Peru	Pyrrhura albipectus	whnpar1
PSITTACIFORMES	PSITTACIDAE	Hapalopsittaca amazonina	Rusty-faced Parrot	1211	3600	NT	Decreasing	37177.3	64144	1.72536	20143	31.4028	No	Colombia Venezuela	Hapalopsittaca amazonina	rufpar2
PSITTACIFORMES	PSITTACIDAE	Leptosittaca branickii	Golden-plumed Parakeet	1653	3829	LC	Decreasing	46449.5	86455	1.86127	28381	32.8275	No	Colombia Ecuador Peru	Leptosittaca branickii	goppar1
PSITTACIFORMES	PSITTACIDAE	Hapalopsittaca fuertesi	Indigo-winged Parrot	1902	4268	EN	Increasing	1697.87	1677	0.987709	557	33.2141	No	Colombiae	Hapalopsittaca fuertesi	inwpar1
PSITTACIFORMES	PSITTACIDAE	Bolborhynchus ferrugineifrons	Rufous-fronted Parakeet	2371	4703	VU	Decreasing	5316.33	5206	0.979246	2083	40.0115	No	Colombiae	Bolborhynchus ferrugineifrons	rufpar1
PSITTACIFORMES	PSITTACIDAE	Hapalopsittaca pyrrhops	Red-faced Parrot	1525	3500	LC	Decreasing	9117.78	8141	0.892871	3929	48.2619	No	Ecuador Peru	Hapalopsittaca pyrrhops	refpar2
PSITTACIFORMES	PSITTACIDAE	Pyrrhura caeruleiceps	Perija Parakeet	400	2200	EN	Decreasing	14126.1	10928	0.773601	6016	55.0512	No	Colombia Venezuela	Pyrrhura picta caeruleiceps	paipar5
PSITTACIFORMES	PSITTACIDAE	Pyrrhura orcesi	El Oro Parakeet	509	1432	EN	Decreasing	1002.91	1061	1.05793	644	60.6975	No	Ecuadore	Pyrrhura orcesi	elopar1
PSITTACIFORMES	PSITTACIDAE	Pyrrhura viridicata	Santa Marta Parakeet	908	3200	EN	Decreasing	1011.69	1126	1.11299	793	70.4263	No	Colombiae	Pyrrhura viridicata	sampar1
PSITTACIFORMES	PSITTACIDAE	Pyrrhura emma	Venezuelan Parakeet	0	2092	LC	Decreasing	33363.9	24720	0.740921	17927	72.5202	No	Venezuelae	Pyrrhura picta emma	paipar6
PSITTACIFORMES	PSITTACIDAE	Pyrrhura rhodocephala	Rose-headed Parakeet	800	3145	LC	Stable	11585.3	7289	0.629158	5512	75.6208	No	Venezuelae	Pyrrhura rhodocephala	rohpar1
PSITTACIFORMES	PSITTACIDAE	Pyrrhura hoematotis	Red-eared Parakeet	49	2273	LC	Decreasing	6303.93	4134	0.655781	3558	86.0668	No	Venezuelae	Pyrrhura hoematotis	reepar1
PASSERIFORMES	THAMNOPHILIDAE	Pithys castaneus	White-masked Antbird	135	250	NT	Decreasing	215.509	141	0.654266	0	0	Yes	Perue	Pithys castaneus	whmant2
PASSERIFORMES	THAMNOPHILIDAE	Thamnophilus shumbae	Maranon Antshrike	0	1072	VU	Decreasing	3025.99	1194	0.394581	7	0.586265	Yes	Perue	Thamnophilus bernardi shumbae	colant3
PASSERIFORMES	THAMNOPHILIDAE	Ampelornis griseiceps	Grey-headed Antbird	459	2900	VU	Decreasing	17850.7	7004	0.392367	916	13.0782	Yes	Ecuador Peru	Ampelornis griseiceps	gyhant1
PASSERIFORMES	THAMNOPHILIDAE	Thamnophilus zarumae	Chapman's Antshrike	301	2650	LC	Decreasing	27874.5	11896	0.42677	1787	15.0219	No	Ecuador Peru	Thamnophilus zarumae	chaant1
PASSERIFORMES	THAMNOPHILIDAE	Clytoctantes alixii	Recurve-billed Bushbird	185	1750	EN	Decreasing	2927.66	23446	8.00845	7089	30.2354	No	Colombia Venezuela	Clytoctantes alixii	rebbus1
PASSERIFORMES	THAMNOPHILIDAE	Drymophila caudata	East Andean Antbird	1200	2787	NT	Decreasing	18604.7	4795	0.257731	1582	32.9927	Yes	Colombiae	Drymophila caudata	lotant1
PASSERIFORMES	THAMNOPHILIDAE	Dysithamnus occidentalis	Bicolored Antvireo	900	2690	NT	Decreasing	13548.8	16035	1.1835	5782	36.0586	No	Colombia Ecuador Peru	Dysithamnus occidentalis	bicant4
PASSERIFORMES	THAMNOPHILIDAE	Drymophila hellmayri	Santa Marta Antbird	500	2355	NT	Decreasing	6438.2	3941	0.612128	1423	36.1076	No	Colombiae	Drymophila hellmayri	samant2
PASSERIFORMES	THAMNOPHILIDAE	Sipia laemosticta	Dull-mantled Antbird	0	1184	LC	Decreasing	36688.6	36653	0.99903	16522	45.0768	No	Colombia CostaRica Panama	Sipia laemosticta	dumant1
PASSERIFORMES	THAMNOPHILIDAE	Xenornis setifrons	Spiny-faced Antshrike	120	1051	NT	Decreasing	6625.77	6337	0.956417	4092	64.5731	No	Colombia Panama	Xenornis setifrons	spfant1
PASSERIFORMES	MELANOPAREIIDAE	Melanopareia maranonica	Maranon Crescentchest	200	2027	LC	Decreasing	16464.4	8114	0.492821	226	2.78531	Yes	Ecuador Peru	Melanopareia maranonica	marcre1
PASSERIFORMES	CONOPOPHAGIDAE	Pittasoma michleri	Black-crowned Pittasoma	0	1187	LC	Decreasing	49173.9	52167	1.06087	20503	39.3026	No	Colombia CostaRica Panama	Pittasoma michleri	blcant1
PASSERIFORMES	GRALLARIIDAE	Grallaria milleri	Brown-banded Antpitta	1460	3450	VU	Decreasing	12698.2	7707	0.606938	1480	19.2033	Yes	Colombiae	Grallaria milleri	brbant1
PASSERIFORMES	GRALLARIIDAE	Grallaria blakei	Chestnut Antpitta	1461	3580	LC	Decreasing	21154.4	18641	0.881187	3737	20.0472	No	Perue	Grallaria blakei	cheant2
PASSERIFORMES	GRALLARIIDAE	Grallaria kaestneri	Cundinamarca Antpitta	1200	2700	EN	Decreasing	491.115	184	0.374658	51	27.7174	Yes	Colombiae	Grallaria kaestneri	cunant1
PASSERIFORMES	GRALLARIIDAE	Grallaria przewalskii	Rusty-tinged Antpitta	1314	2963	LC	Stable	19046.2	17708	0.929741	5237	29.5742	No	Perue	Grallaria przewalskii	rutant5
PASSERIFORMES	GRALLARIIDAE	Grallaria rufocinerea	Bicolored Antpitta	1563	4270	LC	Decreasing	19791.7	15137	0.764814	4767	31.4924	No	Colombia Ecuador	Grallaria rufocinerea	bicant3
PASSERIFORMES	GRALLARIIDAE	Grallaria watkinsi	Watkins's Antpitta	20	2027	NT	Decreasing	16613.4	11369	0.684325	3667	32.2544	No	Ecuador Peru	Grallaria watkinsi	watant1
PASSERIFORMES	GRALLARIIDAE	Grallaria carrikeri	Pale-billed Antpitta	2300	3203	LC	Decreasing	29971.1	6414	0.214006	2222	34.643	No	Perue	Grallaria carrikeri	pabant1
PASSERIFORMES	GRALLARIIDAE	Grallaricula cucullata	Hooded Antpitta	1516	3830	NT	Decreasing	15988.8	12697	0.794118	4857	38.2531	No	Colombiae	Grallaricula cucullata	hooant1
PASSERIFORMES	GRALLARIIDAE	Grallaria ridgelyi	Jocotoco Antpitta	1602	2850	EN	Decreasing	120.439	52	0.431755	24	46.1538	No	Ecuador Peru	Grallaria ridgelyi	jocant1
PASSERIFORMES	GRALLARIIDAE	Grallaricula peruviana	Peruvian Antpitta	1680	2260	NT	Decreasing	6450.42	5824	0.902887	2928	50.2747	No	Ecuador Peru	Grallaricula peruviana	perant1
PASSERIFORMES	GRALLARIIDAE	Grallaricula lineifrons	Crescent-faced Antpitta	2032	4060	LC	Stable	14344.4	2416	0.168428	1282	53.0629	No	Ecuadore	Grallaricula lineifrons	crfant1
PASSERIFORMES	GRALLARIIDAE	Grallaria bangsi	Santa Marta Antpitta	1284	2730	VU	Decreasing	1985.53	1958	0.986134	1056	53.9326	No	Colombiae	Grallaria bangsi	samant1
PASSERIFORMES	GRALLARIIDAE	Grallaricula ochraceifrons	Ochre-fronted Antpitta	1537	2500	VU	Decreasing	1217.58	769	0.631582	435	56.567	No	Perue	Grallaricula ochraceifrons	ocfant1
PASSERIFORMES	GRALLARIIDAE	Grallaria alleni	Moustached Antpitta	1268	3146	VU	Decreasing	8886.61	13514	1.52072	7726	57.1703	No	Colombia Ecuador	Grallaria alleni	mouant1
PASSERIFORMES	GRALLARIIDAE	Grallaria gigantea	Giant Antpitta	1246	3000	VU	Decreasing	13446.5	11195	0.832558	6463	57.7311	No	Colombia Ecuador	Grallaria gigantea	giaant1
PASSERIFORMES	GRALLARIIDAE	Grallaria fenwickorum	Urrao Antpitta	2500	3500	CR	Decreasing	760.061	410	0.53943	266	64.878	No	Colombiae	Grallaria urraoensis	antant1
PASSERIFORMES	GRALLARIIDAE	Grallaria griseonucha	Grey-naped Antpitta	1932	3175	LC	Stable	8254.09	2092	0.25345	1420	67.8776	No	Venezuelae	Grallaria griseonucha	gynant1
PASSERIFORMES	GRALLARIIDAE	Grallaria saltuensis	Perija Antpitta	1710	4070	NT	Decreasing	1603.46	1164	0.72593	900	77.3196	No	Colombia Venezuela	Grallaria saltuensis	rufant6
PASSERIFORMES	GRALLARIIDAE	Grallaria excelsa	Great Antpitta	1454	2815	NT	Decreasing	6032.02	4301	0.713029	3366	78.2609	No	Venezuelae	Grallaria excelsa	greant2
PASSERIFORMES	GRALLARIIDAE	Grallaricula loricata	Scallop-breasted Antpitta	800	2200	NT	Decreasing	11269.9	1693	0.150223	1580	93.3255	No	Venezuelae	Grallaricula loricata	scbant2
PASSERIFORMES	GRALLARIIDAE	Grallaricula cumanensis	Sucre Antpitta	600	1850	VU	Decreasing	2686.84	1862	0.693009	1801	96.724	No	Venezuelae	Grallaricula cumanensis	slcant5
PASSERIFORMES	GRALLARIIDAE	Grallaria chthonia	Tachira Antpitta	2300	3203	CR	Decreasing	496.182	12	0.0241847	12	100	No	Venezuelae	Grallaria chthonia	tacant1
PASSERIFORMES	RHINOCRYPTIDAE	Scytalopus unicolor	Unicolored Tapaculo	2000	3656	NT	Decreasing	8500.65	2883	0.339151	219	7.59625	Yes	Perue	Scytalopus unicolor	unitap1
PASSERIFORMES	RHINOCRYPTIDAE	Scytalopus altirostris	Neblina Tapaculo	1714	3755	LC	Stable	24016.2	19729	0.821489	3503	17.7556	No	Perue	Scytalopus altirostris	nebtap1
PASSERIFORMES	RHINOCRYPTIDAE	Scytalopus acutirostris	Tschudi's Tapaculo	922	4192	LC	Stable	21326.4	20718	0.971471	4261	20.5667	No	Perue	Scytalopus acutirostris	tsctap1
PASSERIFORMES	RHINOCRYPTIDAE	Scytalopus alvarezlopezi	TatamÃƒÂ¡ Tapaculo	760	2568	NT	Decreasing	6917.12	6273	0.90688	1357	21.6324	Yes	Colombiae	Scytalopus alvarezlopezi	alptap1
PASSERIFORMES	RHINOCRYPTIDAE	Scytalopus chocoensis	Choco Tapaculo	250	2003	LC	Stable	25911.4	27750	1.07096	6202	22.3495	No	Colombia Ecuador Panama	Scytalopus chocoensis	chotap1
PASSERIFORMES	RHINOCRYPTIDAE	Scytalopus stilesi	Stiles's Tapaculo	1400	2891	LC	Decreasing	14917	7811	0.52363	1981	25.3617	Yes	Colombiae	Scytalopus stilesi	stitap1
PASSERIFORMES	RHINOCRYPTIDAE	Scytalopus rodriguezi	Magdalena Tapaculo	1314	2537	EN	Decreasing	1915.5	3853	2.01148	1001	25.9798	Yes	Colombiae	Scytalopus rodriguezi	upmtap1
PASSERIFORMES	RHINOCRYPTIDAE	Scytalopus vicinior	Narino Tapaculo	515	3256	LC	Stable	16812.6	27121	1.61313	7332	27.0344	No	Colombia Ecuador	Scytalopus vicinior	nartap2
PASSERIFORMES	RHINOCRYPTIDAE	Scytalopus griseicollis	Pale-bellied Tapaculo	2000	3748	LC	Stable	23911.9	16194	0.677235	4488	27.714	No	Colombia Venezuela	Scytalopus griseicollis	mattap1
PASSERIFORMES	RHINOCRYPTIDAE	Scytalopus sanctaemartae	Santa Marta Tapaculo	885	2596	NT	Decreasing	1415.9	1497	1.05728	591	39.479	No	Colombiae	Scytalopus sanctaemartae	samtap1
PASSERIFORMES	RHINOCRYPTIDAE	Scytalopus parkeri	Chusquea Tapaculo	1850	3350	LC	Stable	14790.2	9457	0.63941	4410	46.6321	No	Ecuador Peru	Scytalopus parkeri	chutap2
PASSERIFORMES	RHINOCRYPTIDAE	Scytalopus robbinsi	Ecuadorian Tapaculo	512	1591	EN	Decreasing	1135.63	1744	1.53571	905	51.8922	No	Ecuadore	Scytalopus robbinsi	ecutap1
PASSERIFORMES	RHINOCRYPTIDAE	Scytalopus canus	Paramillo Tapaculo	2306	4000	NT	Decreasing	3607.17	2022	0.56055	1221	60.3858	No	Colombiae	Scytalopus canus	partap1
PASSERIFORMES	RHINOCRYPTIDAE	Scytalopus latebricola	Brown-rumped Tapaculo	1324	3702	NT	Stable	4065.08	1980	0.487076	1212	61.2121	No	Colombiae	Scytalopus latebricola	brrtap1
PASSERIFORMES	RHINOCRYPTIDAE	Scytalopus meridanus	Merida Tapaculo	1410	4000	LC	Stable	20695.4	7655	0.369888	5933	77.5049	No	Venezuelae	Scytalopus meridanus	mertap1
PASSERIFORMES	RHINOCRYPTIDAE	Scytalopus perijanus	Perija Tapaculo	1600	3225	NT	Decreasing	1003.33	862	0.85914	727	84.3387	No	Colombia Venezuela	Scytalopus perijanus	pertap1
PASSERIFORMES	RHINOCRYPTIDAE	Scytalopus caracae	Caracas Tapaculo	1200	2352	LC	Stable	5235.88	1435	0.27407	1386	96.5854	No	Venezuelae	Scytalopus caracae	cartap1
PASSERIFORMES	RHINOCRYPTIDAE	Scytalopus panamensis	Tacarcuna Tapaculo	1050	1655	NT	Stable	260.205	214	0.822429	214	100	No	Colombia Panama	Scytalopus panamensis	tactap1
PASSERIFORMES	FORMICARIIDAE	Chamaeza turdina	Scalloped Antthrush	900	2600	LC	Stable	14682.8	39105	2.66333	10633	27.1909	No	Colombia Venezuela	Chamaeza turdina	schant1
PASSERIFORMES	FURNARIIDAE	Synallaxis chinchipensis	Chinchipe Spinetail	400	883	LC	Stable	15895.6	1030	0.0647976	3	0.291262	Yes	Perue	Synallaxis chinchipensis	necspi3
PASSERIFORMES	FURNARIIDAE	Synallaxis maranonica	Maranon Spinetail	427	1960	CR	Decreasing	4053.01	5075	1.25216	96	1.89163	Yes	Ecuador Peru	Synallaxis maranonica	marspi3
PASSERIFORMES	FURNARIIDAE	Thripadectes ignobilis	Uniform Treehunter	200	2500	LC	Stable	41008.3	47153	1.14984	9838	20.864	No	Colombia Ecuador	Thripadectes ignobilis	unitre1
PASSERIFORMES	FURNARIIDAE	Margarornis stellatus	Fulvous-dotted Treerunner	631	3384	NT	Decreasing	21926.2	19087	0.870512	4050	21.2186	No	Colombia Ecuador	Margarornis stellatus	fudtre1
PASSERIFORMES	FURNARIIDAE	Synallaxis subpudica	Silvery-throated Spinetail	1815	3703	LC	Stable	15177.7	12675	0.835104	2958	23.3373	No	Colombiae	Synallaxis subpudica	sitspi1
PASSERIFORMES	FURNARIIDAE	Pseudocolaptes johnsoni	Pacific Tuftedcheek	684	3000	LC	Stable	7073.96	21444	3.0314	5345	24.9254	No	Colombia Ecuador	Pseudocolaptes johnsoni	buftuf3
PASSERIFORMES	FURNARIIDAE	Clibanornis erythrocephalus	Henna-hooded Foliage-gleaner	20	2018	NT	Decreasing	18639.9	15585	0.836111	3997	25.6465	No	Ecuador Peru	Clibanornis erythrocephalus	hhfgle1
PASSERIFORMES	FURNARIIDAE	Synallaxis stictothorax	Necklaced Spinetail	0	644	LC	Stable	49675.4	13143	0.264578	3473	26.4247	No	Ecuador Peru	Synallaxis stictothorax	necspi1
PASSERIFORMES	FURNARIIDAE	Cranioleuca berlepschi	Russet-mantled Softtail	1577	3645	NT	Decreasing	5557.83	4999	0.899452	1423	28.4657	Yes	Perue	Thripophaga berlepschi	rumsof1
PASSERIFORMES	FURNARIIDAE	Xenerpestes singularis	Equatorial Greytail	915	2403	NT	Decreasing	30319.6	29258	0.964987	10005	34.1958	No	Ecuador Peru	Xenerpestes singularis	equgra1
PASSERIFORMES	FURNARIIDAE	Clibanornis rufipectus	Santa Marta Foliage-gleaner	600	2061	VU	Decreasing	2042.83	1828	0.894835	629	34.4092	No	Colombiae	Clibanornis rufipectus	samfog1
PASSERIFORMES	FURNARIIDAE	Synallaxis tithys	Blackish-headed Spinetail	0	2534	VU	Decreasing	6119.24	7360	1.20276	2564	34.837	No	Ecuador Peru	Synallaxis tithys	blhspi1
PASSERIFORMES	FURNARIIDAE	Siptornis striaticollis	Spectacled Prickletail	974	2512	LC	Stable	20659	23505	1.13776	10218	43.4716	No	Colombia Ecuador Peru	Siptornis striaticollis	spepri1
PASSERIFORMES	FURNARIIDAE	Asthenes griseomurina	Mouse-colored Thistletail	1674	4000	LC	Decreasing	18912.5	14211	0.751409	6574	46.2599	No	Ecuador Peru	Asthenes griseomurina	mocthi1
PASSERIFORMES	FURNARIIDAE	Cranioleuca hellmayri	Streak-capped Spinetail	1207	3000	LC	Decreasing	6775.56	2199	0.324549	1174	53.3879	No	Colombiae	Cranioleuca hellmayri	stcspi1
PASSERIFORMES	FURNARIIDAE	Synallaxis fuscorufa	Rusty-headed Spinetail	1335	3000	NT	Stable	2113.74	1858	0.87901	1088	58.5576	No	Colombiae	Synallaxis fuscorufa	ruhspi1
PASSERIFORMES	FURNARIIDAE	Asthenes coryi	Ochre-browed Thistletail	1925	4206	LC	Stable	9001.62	3530	0.392152	2502	70.8782	No	Venezuelae	Asthenes coryi	ocbthi1
PASSERIFORMES	FURNARIIDAE	Margarornis bellulus	Beautiful Treerunner	515	1875	NT	Stable	194.357	1067	5.48991	997	93.4396	No	Colombia Panama	Margarornis bellulus	beatre1
PASSERIFORMES	FURNARIIDAE	Syndactyla guttulata	Guttulate Foliage-gleaner	841	2273	LC	Stable	12402.1	3309	0.266809	3149	95.1647	No	Venezuelae	Syndactyla guttulata	gufgle1
PASSERIFORMES	FURNARIIDAE	Synallaxis castanea	Black-throated Spinetail	1200	2531	LC	Stable	1609.92	938	0.582639	898	95.7356	No	Venezuelae	Synallaxis castanea	bltspi1
PASSERIFORMES	FURNARIIDAE	Premnoplex tatei	White-throated Barbtail	496	2410	EN	Decreasing	1474.2	999	0.677657	968	96.8969	No	Venezuelae	Premnoplex tatei	whtbar1
PASSERIFORMES	FURNARIIDAE	Premnoplex pariae	Paria Barbtail	800	1246	EN	Decreasing	230.795	23	0.0996554	23	100	No	Venezuelae	Premnoplex tatei pariae	whtbar3
PASSERIFORMES	PIPRIDAE	Machaeropterus deliciosus	Club-winged Manakin	100	2086	LC	Decreasing	40121.8	40560	1.01092	6774	16.7012	No	Colombia Ecuador	Machaeropterus deliciosus	clwman1
PASSERIFORMES	PIPRIDAE	Chloropipo flavicapilla	Yellow-headed Manakin	772	2400	VU	Decreasing	32718.7	39489	1.20692	10729	27.1696	No	Colombia Ecuador	Chloropipo flavicapilla	yehman2
PASSERIFORMES	COTINGIDAE	Lipaugus weberi	Chestnut-capped Piha	1396	1908	CR	Decreasing	41.874	129	3.08067	13	10.0775	Yes	Colombiae	Lipaugus weberi	chcpih1
PASSERIFORMES	COTINGIDAE	Pipreola squamipectus	Scaly-breasted Fruiteater	850	2300	LC	Decreasing	36381.2	30480	0.837796	7151	23.4613	No	Ecuador Peru	Pipreola frontalis squamipectus	scbfru2
PASSERIFORMES	COTINGIDAE	Pipreola jucunda	Orange-breasted Fruiteater	600	2521	LC	Decreasing	13837.1	17358	1.25445	5193	29.917	No	Colombia Ecuador	Pipreola jucunda	orbfru1
PASSERIFORMES	COTINGIDAE	Lipaugus fuscocinereus	Dusky Piha	1182	3521	LC	Decreasing	42612.9	85787	2.01317	27928	32.555	No	Colombia Ecuador Peru Venezuela	Lipaugus fuscocinereus	duspih1
PASSERIFORMES	COTINGIDAE	Pipreola lubomirskii	Black-chested Fruiteater	1115	2381	LC	Decreasing	28329.9	17196	0.60699	7588	44.1265	No	Colombia Ecuador Peru	Pipreola lubomirskii	blcfru1
PASSERIFORMES	COTINGIDAE	Doliornis remseni	Chestnut-bellied Cotinga	1876	3650	NT	Decreasing	17881.7	18646	1.04274	8841	47.415	No	Colombia Ecuador	Doliornis remseni	chbcot1
PASSERIFORMES	COTINGIDAE	Pipreola formosa	Handsome Fruiteater	49	2200	LC	Stable	12049.2	7583	0.629336	5583	73.6252	No	Venezuelae	Pipreola formosa	hanfru1
PASSERIFORMES	TITYRIDAE	Pachyramphus spodiurus	Slaty Becard	0	1739	VU	Decreasing	40652.1	35579	0.875207	8293	23.3087	No	Ecuador Peru	Pachyramphus spodiurus	slabec1
PASSERIFORMES	TITYRIDAE	Schiffornis aenea	Foothill Mourner	271	2165	LC	Decreasing	42027.9	59847	1.42398	14598	24.3922	No	Colombia Ecuador Peru	Schiffornis aenea	thlsch8
PASSERIFORMES	TITYRIDAE	Laniisoma buckleyi	Andean Mourner	400	1800	NT	Decreasing	35910.8	50975	1.41949	15377	30.1658	No	Bolivia Colombia Ecuador Peru Venezuela	Laniisoma elegans [buckleyi Group]	shlcot2
PASSERIFORMES	TYRANNIDAE	Knipolegus heterogyna	White-rumped Black-tyrant	1737	4319	LC	Stable	21827.4	7520	0.344522	454	6.03723	Yes	Perue	Knipolegus aterrimus heterogyna	whwblt4
PASSERIFORMES	TYRANNIDAE	Myiarchus apicalis	Apical Flycatcher	230	2500	LC	Increasing	41557.3	102063	2.45596	15369	15.0583	No	Colombiae	Myiarchus apicalis	apifly1
PASSERIFORMES	TYRANNIDAE	Myiophobus phoenicomitra	Orange-crested Flycatcher	500	1990	LC	Decreasing	45587.2	12827	0.281373	2131	16.6134	No	Colombia Ecuador Peru	Myiophobus phoenicomitra	orcfly1
PASSERIFORMES	TYRANNIDAE	Lathrotriccus griseipectus	Grey-breasted Flycatcher	0	2739	VU	Decreasing	13751.8	50912	3.70221	11706	22.9926	No	Ecuador Peru	Lathrotriccus griseipectus	gybfly1
PASSERIFORMES	TYRANNIDAE	Attila torridus	Ochraceous Attila	0	1502	VU	Decreasing	5579.77	36820	6.59884	8704	23.6393	No	Colombia Ecuador Peru	Attila torridus	ochatt1
PASSERIFORMES	TYRANNIDAE	Hemitriccus cinnamomeipectus	Cinnamon-breasted Tody-tyrant	488	2343	LC	Stable	6101.28	5028	0.82409	1216	24.1846	Yes	Ecuador Peru	Hemitriccus cinnamomeipectus	cbttyr1
PASSERIFORMES	TYRANNIDAE	Phylloscartes gualaquizae	Ecuadorian Tyrannulet	601	2000	NT	Decreasing	24650.8	50783	2.06009	13748	27.0721	No	Colombia Ecuador Peru	Phylloscartes gualaquizae	ecutyr1
PASSERIFORMES	TYRANNIDAE	Myiopagis olallai	Foothill Elaenia	805	2183	LC	Decreasing	17655.7	22009	1.24657	7173	32.5912	No	Colombia Ecuador Peru	Myiopagis olallai	fooela1
PASSERIFORMES	TYRANNIDAE	Phylloscartes superciliaris	Rufous-browed Tyrannulet	140	2000	LC	Decreasing	21395.8	94344	4.40947	30855	32.7048	No	Colombia CostaRica Ecuador Panama Peru Venezuela	Phylloscartes superciliaris	rubtyr1
PASSERIFORMES	TYRANNIDAE	Poecilotriccus luluae	Lulu's Tody-flycatcher	1078	3116	EN	Decreasing	361.841	1184	3.27216	405	34.2061	No	Perue	Poecilotriccus luluae	johtot1
PASSERIFORMES	TYRANNIDAE	Ochthoeca salvini	Tumbes Tyrant	0	819	NT	Decreasing	25442.5	4715	0.18532	1672	35.4613	No	Ecuador Peru	Ochthoeca salvini	tumtyr2
PASSERIFORMES	TYRANNIDAE	Pogonotriccus lanyoni	Antioquia Bristle-tyrant	306	1012	EN	Decreasing	1563.29	897	0.573791	339	37.7926	No	Colombiae	Pogonotriccus lanyoni	anbtyr1
PASSERIFORMES	TYRANNIDAE	Todirostrum viridanum	Maracaibo Tody-flycatcher	0	741	LC	Decreasing	24017	12103	0.503936	5952	49.1779	No	Venezuelae	Todirostrum viridanum	matfly1
PASSERIFORMES	TYRANNIDAE	Phylloscartes flavovirens	Yellow-green Tyrannulet	1	2000	LC	Stable	17272.4	13846	0.801628	6931	50.0578	No	Colombia Panama Panama	Phylloscartes flavovirens	yegtyr1
PASSERIFORMES	TYRANNIDAE	Nephelomyias lintoni	Orange-banded Flycatcher	1602	3281	NT	Decreasing	11695.6	6106	0.522078	3385	55.4373	No	Ecuador Peru	Nephelomyias lintoni	orbfly1
PASSERIFORMES	TYRANNIDAE	Ochthoeca superciliosa	Rufous-browed Chat-tyrant	1466	4206	LC	Stable	11789.2	5487	0.465425	3547	64.6437	No	Venezuelae	Ochthoeca superciliosa	bnbcht2
PASSERIFORMES	TYRANNIDAE	Zimmerius improbus	Mountain Tyrannulet	400	3063	LC	Stable	24087.6	18644	0.774007	12567	67.4051	No	Colombia Venezuela	Zimmerius improbus	paltyr4
PASSERIFORMES	TYRANNIDAE	Zimmerius petersi	Venezuelan Tyrannulet	400	3000	LC	Decreasing	11638.7	8263	0.70996	6612	80.0194	No	Venezuelae	Zimmerius petersi	paltyr5
PASSERIFORMES	TYRANNIDAE	Myiotheretes pernix	Santa Marta Bush-tyrant	1273	2900	EN	Decreasing	546.689	608	1.11215	497	81.7434	No	Colombiae	Myiotheretes pernix	smbtyr1
PASSERIFORMES	TYRANNIDAE	Pogonotriccus venezuelanus	Venezuelan Bristle-tyrant	60	1644	NT	Decreasing	10622.9	3975	0.374192	3782	95.1447	No	Venezuelae	Pogonotriccus venezuelanus	vebtyr2
PASSERIFORMES	TYRANNIDAE	Phylloscartes flaviventris	Rufous-lored Tyrannulet	49	2023	LC	Decreasing	5227.66	3295	0.630301	3148	95.5387	No	Venezuelae	Phylloscartes flaviventris	rultyr1
PASSERIFORMES	TYRANNIDAE	Phyllomyias urichi	Urich's Tyrannulet	900	1100	EN	Decreasing	1078.78	422	0.391183	421	99.763	No	Venezuelae	Phyllomyias urichi	urityr1
PASSERIFORMES	VIREONIDAE	Pachysylvia semibrunnea	Rufous-naped Greenlet	450	2242	LC	Stable	42187	94916	2.24989	18923	19.9366	No	Colombia Ecuador Venezuela	Pachysylvia semibrunnea	rungre1
PASSERIFORMES	VIREONIDAE	Vireo masteri	Choco Vireo	760	2134	NT	Decreasing	3161.83	11199	3.54194	2238	19.9839	No	Colombia Ecuador	Vireo masteri	chovir1
PASSERIFORMES	CORVIDAE	Cyanolyca pulchra	Beautiful Jay	678	2818	NT	Decreasing	19719	23861	1.21005	4736	19.8483	No	Colombia Ecuador	Cyanolyca pulchra	beajay1
PASSERIFORMES	CORVIDAE	Cyanolyca quindiuna	Quindio Jay	2100	3905	LC	Stable	42875.1	19237	0.448675	7198	37.4175	No	Colombia Ecuador	Cyanolyca armillata quindiuna	bkcjay2
PASSERIFORMES	TROGLODYTIDAE	Pheugopedius sclateri	Maranon Wren	0	2214	LC	Decreasing	15611.6	9091	0.582324	783	8.61291	Yes	Ecuador Peru	Pheugopedius sclateri sclateri	spbwre2	spbwre4
PASSERIFORMES	TROGLODYTIDAE	Pheugopedius columbianus	Colombian Wren	550	2018	LC	Decreasing	14736	15904	1.07926	1515	9.52591	No	Colombiae	Pheugopedius sclateri columbianus	spbwre5
PASSERIFORMES	TROGLODYTIDAE	Henicorhina leucoptera	Bar-winged Wood-wren	1034	2750	LC	Decreasing	10930.4	11452	1.04772	2583	22.555	No	Ecuador Peru	Henicorhina leucoptera	bwwwre1
PASSERIFORMES	TROGLODYTIDAE	Thryophilus sernai	Antioquia Wren	250	1765	VU	Decreasing	2939.9	2086	0.709547	477	22.8667	Yes	Colombiae	Thryophilus sernai	antwre2
PASSERIFORMES	TROGLODYTIDAE	Pheugopedius paucimaculatus	Speckle-breasted Wren	0	1700	LC	Decreasing	47930.3	15513	0.323657	4526	29.1755	No	Ecuador Peru	Pheugopedius sclateri paucimaculatus	spbwre3
PASSERIFORMES	TROGLODYTIDAE	Henicorhina negreti	Munchique Wood-wren	1339	2875	VU	Decreasing	1922.5	1998	1.03927	646	32.3323	Yes	Colombiae	Henicorhina negreti	munwow1
PASSERIFORMES	TROGLODYTIDAE	Thryophilus nicefori	Niceforo's Wren	461	2171	CR	Decreasing	909.789	1865	2.04993	689	36.9437	No	Colombiae	Thryophilus nicefori	nicwre1
PASSERIFORMES	TROGLODYTIDAE	Troglodytes ochraceus	Ochraceous Wren	470	3420	LC	Stable	17334.8	19547	1.12762	11192	57.2569	No	Colombia CostaRica Panama	Troglodytes ochraceus	ochwre1
PASSERIFORMES	TROGLODYTIDAE	Henicorhina anachoreta	Hermit Wood-wren	1334	4000	NT	Decreasing	4428.61	2034	0.459286	1204	59.1937	No	Colombiae	Henicorhina anachoreta	gybwow3
PASSERIFORMES	TROGLODYTIDAE	Troglodytes monticola	Santa Marta Wren	2888	4600	CR	Decreasing	1330.6	58	0.0435893	58	100	No	Colombiae	Troglodytes monticola	samwre1
PASSERIFORMES	TURDIDAE	Turdus maranonicus	Maranon Thrush	200	2522	LC	Decreasing	39620.3	14611	0.368776	1012	6.92629	No	Ecuador Peru	Turdus maranonicus	marthr2
PASSERIFORMES	TURDIDAE	Entomodestes coracinus	Black Solitaire	400	2521	LC	Decreasing	21019.4	29229	1.39057	5188	17.7495	No	Colombia Ecuador	Entomodestes coracinus	blasol1
PASSERIFORMES	TURDIDAE	Cichlopsis chubbi	Chestnut-throated Solitaire	500	1400	NT	Decreasing	5147.45	4453	0.865089	940	21.1094	Yes	Colombia Ecuador	Cichlopsis leucogenys chubbi	rubsol2
PASSERIFORMES	TURDIDAE	Myadestes coloratus	Varied Solitaire	505	1642	NT	Decreasing	1606.19	1917	1.19351	1598	83.3594	No	Colombia Panama	Myadestes coloratus	varsol1
PASSERIFORMES	FRINGILLIDAE	Chlorophonia flavirostris	Yellow-collared Chlorophonia	100	2313	LC	Decreasing	21348.4	30345	1.42142	6463	21.2984	No	Colombia Ecuador Panama	Chlorophonia flavirostris	yecchl1
PASSERIFORMES	FRINGILLIDAE	Spinus siemiradzkii	Saffron Siskin	0	1958	LC	Decreasing	31819	25827	0.811685	5577	21.5937	No	Ecuador Peru	Spinus siemiradzkii	safsis1
PASSERIFORMES	FRINGILLIDAE	Euphonia anneae	Tawny-capped Euphonia	17	1977	LC	Decreasing	20146.5	39977	1.98432	18475	46.2141	No	Colombia CostaRica Panama	Euphonia anneae	taceup1
PASSERIFORMES	PASSERELLIDAE	Atlapetes paynteri	Cream-crowned Brush-finch	1000	2500	LC	Stable	5190.68	3866	0.744797	95	2.45732	Yes	Ecuador Peru	Atlapetes leucopterus paynteri	whwbrf2
PASSERIFORMES	PASSERELLIDAE	Arremon nigriceps	Maranon Sparrow	0	2203	LC	Decreasing	8704.64	5303	0.609215	173	3.2623	Yes	Ecuador Peru	Arremon abeillei nigriceps	bkcspa2
PASSERIFORMES	PASSERELLIDAE	Atlapetes rufigenis	Rufous-eared Brush-finch	2781	4651	LC	Stable	28964.3	4322	0.149218	391	9.04674	Yes	Perue	Atlapetes rufigenis	rebfin1
PASSERIFORMES	PASSERELLIDAE	Atlapetes seebohmi	Bay-crowned Brush-finch	723	3834	LC	Stable	47376.1	17148	0.361955	2420	14.1124	No	Ecuador Peru	Atlapetes seebohmi	bcbfin1
PASSERIFORMES	PASSERELLIDAE	Atlapetes flaviceps	Yellow-headed Brush-finch	1328	2918	NT	Decreasing	38053.8	19303	0.507255	3775	19.5565	No	Colombiae	Atlapetes flaviceps	yehbrf1
PASSERIFORMES	PASSERELLIDAE	Atlapetes albiceps	White-headed Brush-finch	0	1957	LC	Stable	26299.8	11927	0.453502	2368	19.8541	No	Ecuador Peru	Atlapetes albiceps	whbfin1
PASSERIFORMES	PASSERELLIDAE	Oreothraupis arremonops	Tanager Finch	452	3253	LC	Decreasing	13265.1	29108	2.19433	6147	21.1179	No	Colombia Ecuador	Oreothraupis arremonops	tanfin1
PASSERIFORMES	PASSERELLIDAE	Atlapetes blancae	Antioquia Brush-finch	2433	2900	CR	Unknown	230.263	515	2.23658	113	21.9417	Yes	Colombiae	Atlapetes blancae	antbrf1
PASSERIFORMES	PASSERELLIDAE	Atlapetes crassus	Choco Brush-finch	700	2350	LC	Decreasing	32396.9	18712	0.577587	4312	23.044	No	Colombia Ecuador	Atlapetes tricolor crassus	tribrf1
PASSERIFORMES	PASSERELLIDAE	Chlorospingus semifuscus	Dusky Bush-tanager	684	2726	LC	Decreasing	26159.7	17760	0.678907	4183	23.5529	No	Colombia Ecuador	Chlorospingus semifuscus	dubtan1
PASSERIFORMES	PASSERELLIDAE	Atlapetes albofrenatus	Moustached Brush-finch	1234	3192	LC	Stable	31060.2	34973	1.12597	9057	25.8971	No	Colombia Venezuela	Atlapetes albofrenatus	mobfin1
PASSERIFORMES	PASSERELLIDAE	Atlapetes fuscoolivaceus	Dusky-headed Brush-finch	1008	2962	NT	Decreasing	4432.51	9533	2.1507	2709	28.4171	Yes	Colombiae	Atlapetes fuscoolivaceus	dhbfin1
PASSERIFORMES	PASSERELLIDAE	Chlorospingus tacarcunae	Tacarcuna Bush-tanager	502	1655	LC	Decreasing	1499.1	405	0.270162	128	31.6049	Yes	Panamae	Chlorospingus tacarcunae	tabtan1
PASSERIFORMES	PASSERELLIDAE	Arremon basilicus	Sierra Nevada Brush-finch	0	3300	NT	Decreasing	8179.69	4026	0.492195	1732	43.0204	No	Colombiae	Arremon basilicus	sthbrf4
PASSERIFORMES	PASSERELLIDAE	Atlapetes melanocephalus	Santa Marta Brush-finch	1057	3000	LC	Stable	4032.82	1864	0.462208	926	49.6781	No	Colombiae	Atlapetes melanocephalus	smbfin1
PASSERIFORMES	PASSERELLIDAE	Atlapetes leucopis	White-rimmed Brush-finch	900	3396	LC	Stable	12199.8	19088	1.56462	10611	55.5899	No	Colombia Ecuador	Atlapetes leucopis	wrbfin1
PASSERIFORMES	PASSERELLIDAE	Atlapetes meridae	Merida Brush-finch	1218	3861	LC	Stable	10443.8	6378	0.610695	3998	62.6842	No	Venezuelae	Atlapetes albofrenatus meridae	moubru2
PASSERIFORMES	PASSERELLIDAE	Chlorospingus hypophaeus	Orange-throated Bush-tanager	250	2580	LC	Stable	2591.74	2976	1.14826	2000	67.2043	No	Panamae	Chlorospingus flavigularis hypophaeus	yetbut1
PASSERIFORMES	PASSERELLIDAE	Atlapetes nigrifrons	Black-fronted Brush-finch	1500	3067	LC	Stable	2319.47	1762	0.759656	1345	76.3337	No	Colombia Venezuela	Atlapetes latinuchus nigrifrons	yebbru1
PASSERIFORMES	PASSERELLIDAE	Arremon perijanus	Perija Brush-finch	505	2656	VU	Decreasing	6850.86	4552	0.664442	3890	85.4569	No	Colombia Venezuela	Arremon perijanus	sthbrf5
PASSERIFORMES	PASSERELLIDAE	Arremon phaeopleurus	Caracas Brush-finch	0	3300	LC	Decreasing	10309.7	6315	0.612531	5711	90.4355	No	Venezuelae	Arremon phaeopleurus	sthbrf6
PASSERIFORMES	PASSERELLIDAE	Chlorospingus inornatus	Pirre Bush-tanager	481	1641	LC	Stable	1510.62	826	0.546795	788	95.3995	No	Colombia Panama	Chlorospingus inornatus	pibtan1
PASSERIFORMES	PASSERELLIDAE	Arremon phygas	Paria Brush-finch	920	1572	VU	Decreasing	8218.2	572	0.0696016	567	99.1259	No	Venezuelae	Arremon phygas	sthbrf7
PASSERIFORMES	ICTERIDAE	Psarocolius cassini	Baudo Oropendola	6	1604	VU	Decreasing	5505.32	30712	5.5786	2021	6.58049	No	Colombia Panama	Psarocolius cassini	bauoro2
PASSERIFORMES	ICTERIDAE	Molothrus armenti	Bronze-brown Cowbird	0	200	NT	Decreasing	5020.78	2463	0.490561	336	13.6419	Yes	Colombiae	Molothrus aeneus armenti	brocow2
PASSERIFORMES	ICTERIDAE	Hypopyrrhus pyrohypogaster	Red-bellied Grackle	800	2762	VU	Decreasing	3871.81	41054	10.6033	8245	20.0833	No	Colombiae	Hypopyrrhus pyrohypogaster	rebgra1
PASSERIFORMES	ICTERIDAE	Macroagelaius subalaris	Mountain Grackle	1358	3380	EN	Decreasing	1271.1	7281	5.72811	2223	30.5315	Yes	Colombiae	Macroagelaius subalaris	mougra1
PASSERIFORMES	ICTERIDAE	Psarocolius oleagineus	Green-billed Oropendola	216	2000	LC	Unknown	6844.55	3996	0.583822	3560	89.0891	No	Venezuelae	Psarocolius angustifrons oleagineus	ruboro3
PASSERIFORMES	PARULIDAE	Basileuterus trifasciatus	Three-banded Warbler	321	2774	LC	Decreasing	29292.6	17206	0.587385	2297	13.35	No	Ecuador Peru	Basileuterus trifasciatus	thbwar2
PASSERIFORMES	PARULIDAE	Myiothlypis chlorophrys	Choco Warbler	347	1779	LC	Unknown	24149.1	21684	0.897922	4634	21.3706	No	Colombia Ecuador	Myiothlypis chlorophrys	gobwar4
PASSERIFORMES	PARULIDAE	Myioborus ornatus	Yellow-fronted Whitestart	1575	3641	LC	Stable	39629.1	20189	0.509449	5108	25.3009	No	Colombia Venezuela	Myioborus ornatus ornatus	gofred3
PASSERIFORMES	PARULIDAE	Myioborus chrysops	Golden-fronted Whitestart	1800	3818	LC	Stable	31332.2	37659	1.20193	11142	29.5866	No	Colombiae	Myioborus ornatus chrysops	gofred2
PASSERIFORMES	PARULIDAE	Myiothlypis conspicillata	White-lored Warbler	450	2596	NT	Decreasing	2716.57	2770	1.01967	941	33.9711	No	Colombiae	Myiothlypis conspicillata	whlwar1
PASSERIFORMES	PARULIDAE	Myiothlypis cinereicollis	Grey-throated Warbler	800	2605	NT	Decreasing	36285.3	28681	0.790429	10013	34.9116	No	Colombia Venezuela	Myiothlypis cinereicollis	gytwar1
PASSERIFORMES	PARULIDAE	Myioborus flavivertex	Yellow-crowned Whitestart	1200	3050	LC	Stable	3571.56	2525	0.706975	1281	50.7327	No	Colombiae	Myioborus flavivertex	yecred1
PASSERIFORMES	PARULIDAE	Myiothlypis basilica	Santa Marta Warbler	811	3000	NT	Stable	562.956	738	1.31094	470	63.6856	No	Colombiae	Myiothlypis basilica	samwar1
PASSERIFORMES	PARULIDAE	Myioborus pariae	Paria Whitestart	6	1246	EN	Decreasing	302.757	177	0.584627	130	73.4463	No	Venezuelae	Myioborus pariae	parred1
PASSERIFORMES	PARULIDAE	Myioborus albifrons	White-fronted Whitestart	1393	3987	NT	Stable	10474.3	7723	0.737329	5862	75.9031	No	Venezuelae	Myioborus albifrons	whfred2
PASSERIFORMES	PARULIDAE	Basileuterus ignotus	Pirre Warbler	399	1650	VU	Stable	180.742	563	3.11494	562	99.8224	No	Colombia Panama	Basileuterus ignotus	pirwar1
PASSERIFORMES	PARULIDAE	Basileuterus griseiceps	Grey-headed Warbler	713	2440	EN	Decreasing	902.98	1339	1.48287	1337	99.8506	No	Venezuelae	Myiothlypis griseiceps	gyhwar1
PASSERIFORMES	THRAUPIDAE	Wetmorethraupis sterrhopteron	Orange-throated Tanager	258	1276	VU	Decreasing	4143.76	6442	1.55463	55	0.853772	Yes	Ecuador Peru	Wetmorethraupis sterrhopteron	orttan1
PASSERIFORMES	THRAUPIDAE	Incaspiza laeta	Buff-bridled Inca-finch	832	3398	LC	Stable	28938.7	5309	0.183457	345	6.4984	Yes	Perue	Incaspiza laeta	bbifin1
PASSERIFORMES	THRAUPIDAE	Bangsia rothschildi	Golden-chested Tanager	0	1210	LC	Decreasing	20012.5	14152	0.707157	1428	10.0904	No	Colombia Ecuador	Bangsia rothschildi	goctan1
PASSERIFORMES	THRAUPIDAE	Saltator nigriceps	Black-cowled Saltator	434	2755	LC	Unknown	26526.6	14675	0.553218	1762	12.0068	No	Ecuador Peru	Saltator nigriceps	blcsal1
PASSERIFORMES	THRAUPIDAE	Ramphocelus flammigerus	Flame-rumped Tanager	0	2325	LC	Stable	31696.2	35030	1.10518	4416	12.6063	No	Colombiae	Ramphocelus flammigerus flammigerus	flrtan2
PASSERIFORMES	THRAUPIDAE	Sphenopsis piurae	Piura Hemispingus	931	2648	LC	Unknown	12282.6	870	0.0708317	141	16.2069	Yes	Ecuador Peru	Sphenopsis melanotis piurae/macrophrys	bkehem1
PASSERIFORMES	THRAUPIDAE	Dacnis berlepschi	Scarlet-breasted Dacnis	0	1002	VU	Decreasing	11710.4	14627	1.24906	2660	18.1855	No	Colombia Ecuador	Dacnis berlepschi	scbdac1
PASSERIFORMES	THRAUPIDAE	Dacnis hartlaubi	Turquoise Dacnis	300	2200	VU	Decreasing	14736.2	44739	3.03599	8269	18.4828	No	Colombiae	Dacnis hartlaubi	turdac1
PASSERIFORMES	THRAUPIDAE	Tangara palmeri	Grey-and-gold Tanager	0	1845	LC	Decreasing	44180.4	113149	2.56107	21082	18.6321	No	Colombia Ecuador Panama	Poecilostreptus palmeri	gagtan1
PASSERIFORMES	THRAUPIDAE	Tangara rufigula	Rufous-throated Tanager	400	2100	LC	Decreasing	23082.9	28933	1.25344	5492	18.9818	No	Colombia Ecuador	Ixothraupis rufigula	ruttan1
PASSERIFORMES	THRAUPIDAE	Tangara lunigera	Yellow-faced Tanager	1000	2600	LC	Decreasing	28797.2	14804	0.514078	3134	21.17	No	Colombia Ecuador	Tangara parzudakii lunigera	flftan3
PASSERIFORMES	THRAUPIDAE	Cnemoscopus chrysogaster	Golden-bellied Tanager	1482	3000	LC	Decreasing	49475	21285	0.430217	4720	22.1752	No	Bolivia Ecuador Peru	Cnemoscopus rubrirostris chrysogaster	gyhbut3
PASSERIFORMES	THRAUPIDAE	Chlorochrysa phoenicotis	Glistening-green Tanager	561	2330	LC	Decreasing	33623.9	36320	1.08018	8281	22.8001	No	Colombia Ecuador	Chlorochrysa phoenicotis	glgtan1
PASSERIFORMES	THRAUPIDAE	Diglossa indigotica	Indigo Flowerpiercer	627	2443	LC	Decreasing	19980.8	24766	1.23949	5720	23.0962	No	Colombia Ecuador	Diglossa indigotica	indflo1
PASSERIFORMES	THRAUPIDAE	Chlorochrysa nitidissima	Multicolored Tanager	884	3767	NT	Decreasing	16794.5	26537	1.5801	6262	23.5972	No	Colombiae	Chlorochrysa nitidissima	multan1
PASSERIFORMES	THRAUPIDAE	Iridosornis porphyrocephalus	Purplish-mantled Tanager	819	2897	NT	Decreasing	21850.2	27646	1.26525	6548	23.6852	No	Colombia Ecuador	Iridosornis porphyrocephalus	pumtan2
PASSERIFORMES	THRAUPIDAE	Anisognathus notabilis	Black-chinned Mountain-tanager	684	2521	LC	Decreasing	18609.6	21043	1.13076	5191	24.6685	No	Colombia Ecuador	Anisognathus notabilis	bcmtan2
PASSERIFORMES	THRAUPIDAE	Bangsia melanochlamys	Black-and-gold Tanager	562	2481	VU	Decreasing	3988.85	10258	2.57167	2703	26.3502	No	Colombiae	Bangsia melanochlamys	bagtan2
PASSERIFORMES	THRAUPIDAE	Poospiza rufosuperciliaris	Rufous-browed Hemispingus	1414	3634	LC	Unknown	6681.55	8205	1.22801	2417	29.4576	Yes	Perue	Poospiza rufosuperciliaris	rubhem1
PASSERIFORMES	THRAUPIDAE	Bangsia flavovirens	Yellow-green Tanager	390	2064	VU	Decreasing	735.838	3955	5.37482	1243	31.4286	Yes	Colombia Ecuador	Bangsia flavovirens	ygbtan1
PASSERIFORMES	THRAUPIDAE	Bangsia edwardsi	Moss-backed Tanager	742	2100	LC	Decreasing	19030.9	8204	0.431089	2678	32.6426	Yes	Colombia Ecuador	Bangsia edwardsi	mobtan1
PASSERIFORMES	THRAUPIDAE	Xenodacnis petersi	Streaked Dacnis	3000	4607	LC	Decreasing	20881.9	2175	0.104157	729	33.5172	No	Ecuador Peru	Xenodacnis parina petersi/bella	tildac3
PASSERIFORMES	THRAUPIDAE	Sphenopsis ochracea	Western Hemispingus	1235	2500	LC	Stable	1281.56	991	0.773275	333	33.6024	No	Colombia Ecuador	Sphenopsis melanotis ochracea	bkehem3
PASSERIFORMES	THRAUPIDAE	Tangara florida	Emerald Tanager	0	1327	LC	Decreasing	37067.1	63928	1.72466	22016	34.4387	No	Colombia CostaRica Ecuador Panama	Tangara florida	emetan1
PASSERIFORMES	THRAUPIDAE	Bangsia aureocincta	Gold-ringed Tanager	1190	2736	VU	Decreasing	1199.65	968	0.806904	364	37.6033	No	Colombiae	Bangsia aureocincta	gortan1
PASSERIFORMES	THRAUPIDAE	Heterospingus rubrifrons	Sulphur-rumped Tanager	0	900	LC	Decreasing	22681	29316	1.29254	11698	39.9031	No	Colombia CostaRica Panama	Heterospingus rubrifrons	surtan1
PASSERIFORMES	THRAUPIDAE	Urothraupis stolzmanni	Stolzmann's Tanager	2106	4455	LC	Stable	36297.2	32072	0.883594	13350	41.6251	No	Colombia Ecuador	Urothraupis stolzmanni	bbbtan1
PASSERIFORMES	THRAUPIDAE	Dacnis viguieri	Viridian Dacnis	0	1126	LC	Decreasing	15481.2	17470	1.12847	7520	43.0452	No	Colombia Panama	Dacnis viguieri	virdac1
PASSERIFORMES	THRAUPIDAE	Tephrophilus wetmorei	Masked Mountain-tanager	1827	4053	VU	Decreasing	12901.2	35385	2.74277	15719	44.4228	No	Colombia Ecuador Peru Venezuela	Tephrophilus wetmorei	mamtan1
PASSERIFORMES	THRAUPIDAE	Chrysothlypis chrysomelas	Black-and-yellow Tanager	59	1600	LC	Decreasing	15703.5	31867	2.02929	14829	46.534	No	Colombia CostaRica Panama	Chrysothlypis chrysomelas	baytan2
PASSERIFORMES	THRAUPIDAE	Anisognathus melanogenys	Santa Marta Mountain-tanager	1290	3000	LC	Decreasing	7906.83	2336	0.295441	1206	51.6267	No	Colombiae	Anisognathus melanogenys	bkcmot1
PASSERIFORMES	THRAUPIDAE	Bangsia arcaei	Blue-and-gold Tanager	300	1500	NT	Decreasing	9434.46	10866	1.15174	5832	53.672	No	Colombia CostaRica Panama	Bangsia arcaei	bagtan1
PASSERIFORMES	THRAUPIDAE	Dubusia carrikeri	Carriker's Mountain-tanager	1635	3600	EN	Decreasing	4322.62	1225	0.283393	768	62.6939	No	Colombiae	Dubusia taeniata carrikeri	bubmot4
PASSERIFORMES	THRAUPIDAE	Diglossa gloriosissima	Chestnut-bellied Flowerpiercer	1351	3800	NT	Unknown	1245.03	1529	1.22808	969	63.3748	No	Colombiae	Diglossa gloriosissima	chbflo1
PASSERIFORMES	THRAUPIDAE	Thlypopsis fulviceps	Fulvous-headed Tanager	705	2605	LC	Stable	40003	19652	0.491263	12987	66.0849	No	Colombia Venezuela	Thlypopsis fulviceps	fuhtan1
PASSERIFORMES	THRAUPIDAE	Poospiza goeringi	Slaty-backed Hemispingus	2254	3200	NT	Stable	1992.24	1273	0.638978	871	68.4211	No	Venezuelae	Poospiza goeringi	slbhem1
PASSERIFORMES	THRAUPIDAE	Tangara arthus	Chestnut-breasted Tanager	468	2333	LC	Decreasing	38919.7	13799	0.35455	10787	78.1723	No	Venezuelae	Tangara arthus arthus	goltan2
PASSERIFORMES	THRAUPIDAE	Kleinothraupis reyi	Grey-capped Hemispingus	1737	4319	NT	Stable	5979.42	4465	0.746728	3499	78.3651	No	Venezuelae	Kleinothraupis reyi	gychem1
PASSERIFORMES	THRAUPIDAE	Diglossa gloriosa	Merida Flowerpiercer	1690	4047	LC	Stable	11425.3	5158	0.451453	4148	80.4188	No	Venezuelae	Diglossa gloriosa	merflo1
PASSERIFORMES	THRAUPIDAE	Tangara fucosa	Green-naped Tanager	407	1875	LC	Stable	1086.1	1524	1.40318	1319	86.5486	No	Colombia Panama	Tangara fucosa	grntan1
PASSERIFORMES	THRAUPIDAE	Tangara rufigenis	Rufous-cheeked Tanager	45	2150	LC	Decreasing	6837.82	3410	0.498697	3080	90.3226	No	Venezuelae	Tangara rufigenis	ructan2
PASSERIFORMES	THRAUPIDAE	Diglossa venezuelensis	Venezuelan Flowerpiercer	885	2450	EN	Decreasing	795.992	806	1.01257	804	99.7519	No	Venezuelae	Diglossa venezuelensis	venflo1
* Red downward arrows show where AOH is smaller than the published range. These species may be set as a priority based on reduced habitat relative to the historical range size.
** Red colored cells show priority species based on reduced AOH and protection.
e Endemic
